# Supplementary material for: Identification of high protein kinase CK2α in HPV(+) oropharyngeal squamous cell carcinoma and correlation with clinical outcomes
Source: PeerJ. 2021 Dec 13;9:e12519. doi: 10.7717/peerj.12519 (PMC8675248; doi:10.7717/peerj.12519)
Supplement: Supplemental Information 1 [file peerj-09-12519-s001.xlsx]

## Sheet: Sheet1
HISTOLOGY (ICD-O-3)	Gender	Age of Diagnosis	Race	Smoking Status	Smoking Pack-year	Alcohol	Tumor Subsite	T	N	M	AJCC Stage	Treatment Modality	Disease Progression	Death	Progression Free Survival Time (Days)	Overall Survival Time (Days)	CK2 IHC score (Intensity; 1-3)	Ki 67 index <10% = Low 10-20% = borderline >20%= high	Ki 67 % positive	p16	HPV E6 and E7 status
SQUAMOUS CELL CARCIN	M	68	White	F	35	F	B	T2	N1	M0	III	CCRT/SUR	1	1	1060	3374	3	High, 60%	60	Y	Positive
SQUAMOUS CELL CARCIN	M	58	White	F	180	F	B	T3	N2b	M0	IVA	CCRT/SUR	0	0	4201	4201	3	High, >90	90	Y	Positive
SQUAMOUS CELL CARCIN	M	54	White	C	100	Y	T	T4b	N2b	M0	IVB	XRT/SUR	1	1	3785	252	3	high, 65	65	Y	Positive
SQUAMOUS CELL CARCIN	M	75	White	C	30	N	T	T2	N2b	M0	IVA	CCRT	1	1	577	747	2	borderline, 20	20	N	Positive
SQUAMOUS CELL CARCIN	M	55	White	C	20	F	T	T2	N2b	M0	IVA	CCRT/SUR	1	1	728	782	2	High, 50	50	N	Positive
SQUAMOUS CELL CARCIN	M	57	White	F	20	Y	B	T2	N2c	M0	IVA	CCRT	1	1	890	1003	2	High, 60	30	Y	Positive
SQUAMOUS CELL CARCIN	M	70	White	F	60	N	T	T2	N2c	M0	IVA	CCRT/SUR	0	0	4076	4076	2	High, 65	65	Y	Positive
SQUAMOUS CELL CARCIN	M	54	White	F	20	Y	T	T2	N2b	M0	IVA	CCRT/SUR	0	0	4137	4137	3	High, 85	85	Y	Positive
SQUAMOUS CELL CARCIN	M	64	White	C	120	F	T	T1	N2b	M0	IVA	CCRT/SUR	0	1	1255	1255	1	High, 30	30	N	Negative
SQUAMOUS CELL CARCIN	M	55	White	F	10	F	T	T1	N2a	M0	IVA	SUR/CCRT	0	0	3551	3551	3	high, >90	90	Y	Positive
SQUAMOUS CELL CARCIN	M	69	Unknown	F	U	N	T	T1	N0	M0	I	XRT	1	1	1827	2964	1	High, 40	40	N	Negative
SQUAMOUS CELL CARCIN	M	64	White	C	50	Y	T/S	T3	N2c	M0	IVA	CCRT	1	1	98	280	1	High, 35	35	N	Negative
SQUAMOUS CELL CARCIN	M	64	White	F	45	Y	T	T3	N2c	M0	IVA	CCRT	0	0	3850	3850	2	High, 65	65	Y	Positive
SQUAMOUS CELL CARCIN	M	75	Unknown	C	60	Y	B	T4a	N2b	M0	IVA	CCRT	0	1	94	94	2	borderline, 20	20	Y	Positive
SQUAMOUS CELL CARCIN	M	56	White	C	U	N	T	T4a	N2b	M0	IVA	CCRT	1	1	123	355	1	borderline, 20	20	N	Negative
SQUAMOUS CELL CARCIN	M	57	White	C	60	Y	T	T4a	N2c	M0	IVA	CCRT	1	1	113	586	2	High, 25	25	N	Negative
SQUAMOUS CELL CARCIN	M	53	White	F	40	F	T	T4a	N2b	M0	IVA	CCRT/SUR	0	0	3795	3795	1	borderline, 20	20	Y	Positive
SQUAMOUS CELL CARCIN	M	60	White	C	45	Y	T	T3	N1	M0	III	CCRT	1	1	2610	2798	2	borderline, 20	20	N	Negative
SQUAMOUS CELL CARCIN	M	70	White	C	U	F	S	T1	N0	M0	I	SUR	0	1	3032	3032	1	High, 25	25	N	Negative
BASALOID SQUAMOUS CE	M	75	White	C	75	F	B	T2	N2b	M0	IVA	CCRT	1	0	120	3376	3	High, 70	70	Y	Positive
SQUAMOUS CELL CARCIN	M	60	Unknown	C	80	Y	B	T4a	N0	M0	IVA	CCRT	0	1	275	570	3	High, 65	65	Y	Positive
SQUAMOUS CELL CARCIN	M	61	White	C	20	Y	B	T1	N2c	M0	IVA	CCRT/SUR	1	1	118	352	2	High, 55	55	Y	Positive
SQUAMOUS CELL CARCIN	M	66	White	C	60	Y	T	T2	N1	M0	III	XRT	1	1	139	197	1	low, 9	9	N	Negative
SQUAMOUS CELL CARCIN	M	59	Unknown	C	U	C	T	T2	N0	M0	II	XRT	1	1	111	739	1	High, 50	50	N	Negative
BASALOID SQUAMOUS CE	M	57	White	C	90	F	T	T2	N1	M0	III	CCRT	1	1	254	928	2	High, 45	45	Y	Positive
SQUAMOUS CELL CARCIN	M	75	White	N	0	Y	T	T3	N0	M0	III	SUR/CCRT	0	0	2748	2748	3	High, 75	75	Y	Positive
SQUAMOUS CELL CARCIN	M	62	White	C	50	F	B	T2	N0	M0	II	XRT	0	0	2829	2829	3	High, 50	50	Y	Positive
SQUAMOUS CELL CARCIN	M	69	White	C	U	Y	T	T1	N0	M0	I	SUR	0	0	3060	3060	1	borderline, 20	20	Y	Negative
SQUAMOUS CELL CARCIN	M	57	White	F	U	F	B	T1	N3	M0	IVB	CCRT/SUR	1	1	552	578	3	High, 60	60	Y	Positive
SQUAMOUS CELL CARCIN	M	71	White	F	20	Y	B	T1	N3	M0	IVB	CCRT	0	1	940	940	1	High, 30	30	Y	Positive
SQUAMOUS CELL CARCIN	M	54	White	F	U	Y	B	T2	N2c	M0	IVA	CCRT/SUR	0	0	3060	3060	3	High, 60	60	Y	Positive
SQUAMOUS CELL CARCIN	M	58	White	C	70	F	B	T3	N2c	M0	IVA	CCRT	1	1	322	563	3	borderline, 10	10	N	Negative
SQUAMOUS CELL CARCIN	M	53	White	C	30	Y	T	T3	N2b	M0	IVA	CCRT	1	1	140	885	1	High, 30	30	N	Negative
SQUAMOUS CELL CARCIN	M	53	White	C	60	Y	B	T3	N2c	M0	IVA	CCRT	0	0	3108	3108	2	High, 70	70	Y	Positive
SQUAMOUS CELL CARCIN	M	50	White	C	U	F	B	T4a	N2c	M0	IVA	CCRT	0	0	2918	2918	3	borderline, 20	20	Y	Positive
SQUAMOUS CELL CARCIN	M	61	White	F	10	Y	T	T1	N2b	M0	IVA	CCRT	0	0	2520	2520	2	High, 30	30	Y	Positive
SQUAMOUS CELL CARCIN	M	67	White	C	80	F	P	T4b	N0	M0	IVB	CCRT	0	0	2563	2563	1	borderilne, 15	15	N	Negative
SQUAMOUS CELL CARCIN	M	62	White	C	15	Y	B	T1	N2a	M0	IVA	SUR/CCRT	0	0	2789	2789	2	High, 60	60	Y	Positive
SQUAMOUS CELL CARCIN	M	61	White	C	60	Y	T	T4a	N2b	M0	IVA	CCRT	1	0	1340	2589	2	High, 40	40	Y	Positive
SQUAMOUS CELL CARCIN	M	61	White	C	25	Y	T	T1	N1	M0	III	SUR/CCRT	1	1	423	714	1	high, 30	30	Y	Positive
BASALOID SQUAMOUS CE	M	68	White	F	20	Y	T	T2	N0	M0	II	XRT	1	1	1821	2469	2	high, 65	65	Y	Positive
SQUAMOUS CELL CARCIN	M	59	White	C	80	Y	T	T1	N0	M0	I	SUR/XRT	0	0	2472	2472	2	High, 35	35	Y	Positive
SQUAMOUS CELL CARCIN	M	59	White	F	U	F	T	T2	N0	M0	II	SUR/XRT	0	0	2662	2662	2	high, 55	55	Y	Positive
SQUAMOUS CELL CARCIN	M	54	White	C	50	F	T	T2	N2b	M0	IVA	CCRT	1	1	233	285	2	High, 40	40	Y	Positive
SQUAMOUS CELL CARCIN	M	54	White	C	35	F	T	T2	N2b	M0	IVA	CCRT	1	1	555	803	2	borderline, 15	15	N	Negative
SQUAMOUS CELL CARCIN	M	59	African American	C	60	Y	S	T2	N3	M0	IVB	CCRT	1	1	522	572	1	high, 25	25	N	Negative
SQUAMOUS CELL CARCIN	M	66	Unknown	F	60	F	B	T4a	N3	M0	IVB	CCRT	1	0	264	380	2	borderline, 10	10	Y	Positive
SQUAMOUS CELL CARCIN	M	60	White	C	96	Y	B	T1	N2b	M0	IVA	CCRT	0	1	864	864	2	High, 35	35	Y	Positive
SQUAMOUS CELL CARCIN	M	50	White	C	30	Y	T	T1	N2b	M0	IVA	CCRT	0	0	1905	1905	2	high, 30	30	Y	Positive
SQUAMOUS CELL CARCIN	M	79	White	F	90	Y	B	T1	N2a	M0	IVA	CCRT	0	0	2019	2019	2	high 35	35	Y	Positive
SQUAMOUS CELL CARCIN	M	66	White	F	20	F	B	T3	N2c	M0	IVA	CCRT	0	1	391	391	1	high, 20	20	N	Negative
SQUAMOUS CELL CARCIN	M	82	White	F	80	Y	S	T1	N0	M0	I	SUR	0	1	642	642	2	high, 25	25	N	Negative
SQUAMOUS CELL CARCIN	M	58	White	C	45	F	T/P	T3	N0	M0	III	CCRT	1	1	685	836	1	borderline, 20	20	N	Negative
BASALOID SQUAMOUS CE	M	64	White	F	15	F	B	T1	N1	M0	III	SUR/XRT	0	0	2184	2184	2	high, 25	25	Y	Positive
SQUAMOUS CELL CARCIN	M	63	White	F	20	Y	T	T1	N3	M0	IVB	SUR/CCRT	1	0	149	2293	3	High, 35	35	Y	Positive
BASALOID SQUAMOUS CE	M	65	White	C	50	Y	T	T2	N2c	M0	IVA	CCRT	0	1	253	253	2	high, 85	85	Y	Positive
SQUAMOUS CELL CARCIN	M	62	White	C	35	Y	T	T1	N1	M0	III	XRT	1	0	2086	2115	2	low, 8	8	N	Negative
SQUAMOUS CELL CARCIN	M	80	White	F	U	Y	T	T2	N2b	M0	IVA	SUR	0	1	456	456	3	Borderline, 15	15	Y	Positive
SQUAMOUS CELL CARCIN	M	69	White	F	50	F	B	T2	N2b	M0	IVA	CCRT	0	0	904	904	3	borderline, 15	15	Y	Positive
SQUAMOUS CELL CARCIN	M	64	White	C	100	Y	T	T2	N3	M0	IVB	CCRT	1	1	57	71	1	Low, 0-1%	1	N	Negative
SQUAMOUS CELL CARCIN	M	53	White	F	90	F	B	T3	N2b	M0	IVA	CCRT	0	0	1450	1450	2	high, 70	70	Y	Positive
SQUAMOUS CELL CARCIN	M	44	African American	N	0	N	T	T3	N3	M0	IVB	CCRT	0	0	2107	2107	3	High, 60	60	Y	Positive
SQUAMOUS CELL CARCIN	M	61	White	C	40	F	B	T1	N2b	M0	IVA	CCRT	1	1	116	164	1	borderline, 20	20	N	Negative
SQUAMOUS CELL CARCIN	M	58	White	F	30	N	T	T1	N2a	M0	IVA	SUR/XRT	0	0	1735	1735	3	High, 30	30	Y	Positive
SQUAMOUS CELL CARCIN	M	60	White	C	U	F	T	T1	N2b	M0	IVA	SUR/CCRT	0	0	1850	1850	2	borderline, 10	10	Y	Positive
SQUAMOUS CELL CARCIN	M	63	White	F	45	N	T	T2	N2c	M0	IVA	CCRT	0	0	2045	2045	2	High, 40	40	Y	Positive
SQUAMOUS CELL CARCIN	M	60	White	C	35	F	T	T1	N0	M0	I	SUR	0	0	1943	1943	1	Low, 5	5	N	Negative
BASALOID SQUAMOUS CE	M	62	African American	F	40	F	B	T3	N2b	M0	IVA	CCRT	1	1	213	789	2	Boderline, 15	15	Y	Positive
SQUAMOUS CELL CARCIN	M	65	White	C	55	Y	T	T3	N2b	M0	IVA	CCRT	1	0	148	1735	2	Boderline, 15	15	N	Negative
SQUAMOUS CELL CARCIN	M	63	White	C	30	F	T/S	T3	N2c	M0	IVA	CCRT	0	0	1912	1912	3	Boderline, 15	15	N	Negative
BASALOID SQUAMOUS CE	M	88	Unknown	C	20	F	T	T2	N0	M0	II	SUR	0	0	1220	1220	1	High, 30	30	Y	Positive
SQUAMOUS CELL CARCIN	M	61	White	F	U	N	B	T1	N2b	M0	IVA	XRT	0	0	1374	1374	3	High, 25	25	U	Positive
SQUAMOUS CELL CARCIN	M	55	White	F	U	Y	B	T1	N2c	M0	IVA	CCRT	0	0	1534	1534	2	High, 40	40	Y	Positive
BASALOID SQUAMOUS CE	M	64	White	C	80	N	B	T2	N2b	M0	IVA	CCRT	0	0	1638	1638	3	high, 80	80	Y	Positive
SQUAMOUS CELL CARCIN	M	59	White	C	45	F	T	T1	N0	M0	I	SUR/XRT	0	0	1422	1422	1	borderline 15	15	N	Negative
SQUAMOUS CELL CARCIN	M	64	White	F	2.5	Y	T	T1	N1	M0	III	SUR/CCRT	0	0	1514	1514	2	high, 30	30	Y	Positive
SQUAMOUS CELL CARCIN	M	55	White	C	40	F	T	T4a	N3	M0	IVB	CCRT	0	0	1423	1423	2	high, 25	25	Y	Positive
SQUAMOUS CELL CARCIN	M	66	White	C	50	Y	B	T1	N2c	M0	IVA	CCRT	1	1	83	318	3	high, 30	30	Y	Positive
BASALOID SQUAMOUS CE	M	70	White	F	U	F	T	T1	N2b	M0	IVA	CCRT	0	0	996	996	2	high, 70	70	Y	Positive
SQUAMOUS CELL CARCIN	M	69	White	F	12	Y	T	T1	N2c	M0	IVA	CCRT	1	1	819	1075	1	borderline, 20	20	Y	Positive
SQUAMOUS CELL CARCIN	M	63	White	C	40	Y	T	T1	N2b	M0	IVA	SUR/CCRT	0	0	1194	1194	2	high, 25	25	Y	Positive
SQUAMOUS CELL CARCIN	M	65	White	C	45	Y	T	T1	N3	M0	IVB	CCRT	0	0	998	998	2	high, 30	30	Y	Positive
SQUAMOUS CELL CARCIN	M	63	White	C	U	F	B	T2	N2b	M0	IVA	CCRT	0	0	1187	1187	2	high, 30	30	Y	Positive
SQUAMOUS CELL CARCIN	M	64	White	C	60	N	B	T2	N2b	M0	IVA	CCRT	0	0	1227	1227	2	high, 50	50	Y	Positive
SQUAMOUS CELL CARCIN	M	66	White	F	49	Y	S	T1	N0	M0	I	SUR	0	1	648	648	1	borderline, 10	10	N	Negative
BASALOID SQUAMOUS CE	M	73	White	F	U	F	T	T2	N1	M0	III	CCRT	0	0	1009	1009	2	high, 60	60	Y	Positive
SQUAMOUS CELL CARCIN	M	68	White	F	U	F	T	T2	N1	M0	III	CCRT	0	0	1025	1025	3	high, 75	75	Y	Positive
SQUAMOUS CELL CARCIN	M	69	White	F	30	F	S	T2	N0	M0	II	SUR	0	0	1054	1054	2	borderline, 20	20	N	Negative
SQUAMOUS CELL CARCIN	M	66	White	F	17	N	B	T1	N1	M0	III	CCRT	0	0	1072	1072	3	high, 80	80	Y	Positive
SQUAMOUS CELL CARCIN	M	64	White	C	40	F	B	T2	N0	M0	II	CCRT	1	0	0	1263	2	High, 35	35	Y	Positive
SQUAMOUS CELL CARCIN	M	66	White	N	0	Y	T	T3	N2b	M0	IVA	CCRT	0	0	786	786	3	high, 30	30	Y	Positive
SQUAMOUS CELL CARCIN	M	50	White	F	25	Y	T	T1	N2b	M0	IVA	CCRT	0	0	617	617	2	high, 40	40	Y	Positive
SQUAMOUS CELL CARCIN	M	64	White	N	0	N	T	T1	N2b	M0	IVA	CCRT	0	0	815	815	2	High, 35	35	Y	Positive
SQUAMOUS CELL CARCIN	M	57	White	F	28	N	T	T3	N2c	M0	IVA	CCRT	0	0	853	853	1	high, 60	60	Y	Positive
BASALOID SQUAMOUS CE	M	66	White	C	50	Y	T	T2	N2b	M0	IVA	CCRT/SUR	0	0	834	834	2	high, 85	85	Y	Positive
SQUAMOUS CELL CARCIN	M	62	White	C	50	Y	T	T1	N0	M0	I	SUR	0	0	729	729	2	high, 30	30	Y	Positive
SQUAMOUS CELL CARCIN	M	61	White	C	30	Y	T	T1	N0	M0	I	XRT	0	0	752	752	1	low, 5	5	N	Negative
SQUAMOUS CELL CARCIN	M	64	White	F	100	F	T	T3	N2c	M0	IVA	CCRT	1	1	165	520	2	High, 35	35	N	Negative
SQUAMOUS CELL CARCIN	M	65	White	N	0	Y	B	T1	N1	M0	III	XRT	0	0	835	835	2	high, 30	30	Y	Positive
SQUAMOUS CELL CARCIN	M	68	White	F	50	Y	T	T1	N1	M0	III	SUR	0	0	918	918	3	high, 30	30	Y	Negative
SQUAMOUS CELL CARCIN	M	64	White	C	55	Y	T	T4a	N0	M0	IVA	CCRT	1	0	152	536	3	high, 45	45	Y	Positive
SQUAMOUS CELL CARCIN	M	53	White	C	25	Y	B	T4a	N2b	M0	IVA	CCRT	1	1	132	634	2	high, 70	70	N	Negative
SQUAMOUS CELL CARCIN	M	76	White	F	50	F	B	T4a	N2c	M0	IVA	CCRT	1	0	229	713	3	high, 55	55	Y	Positive
SQUAMOUS CELL CARCIN	M	79	Unknown	F	20	N	T	T1	N2b	M0	IVA	XRT	0	1	91	91	2	high, 70	70	Y	Positive
BASALOID SQUAMOUS CE	M	55	White	F	30	N	B	T1	N2a	M0	IVA	CCRT	0	0	287	287	3	high, 75	75	Y	Positive
BASALOID SQUAMOUS CE	M	65	White	F	90	F	T	T1	N2b	M0	IVA	CCRT	0	0	322	322	2	borderline, 15	15	Y	Positive
BASALOID SQUAMOUS CE	M	64	White	F	30	F	B	T1	N2a	M0	IVA	CCRT	0	0	451	451	2	high, 60	60	Y	Positive
SQUAMOUS CELL CARCIN	M	69	White	F	10	Y	T	T1	N2a	M0	IVA	CCRT	0	0	455	455	3	high, 65	65	Y	Positive
SQUAMOUS CELL CARCIN	M	64	White	C	20	Y	B	T1	N2a	M0	IVA	CCRT	0	0	547	547	2	high, 65	65	Y	Positive
SQUAMOUS CELL CARCIN	M	62	White	F	4	N	B	T2	N2b	M0	IVA	CCRT	0	0	211	211	2	high, 60	60	Y	Positive
SQUAMOUS CELL CARCIN	M	63	White	C	45	Y	T	T2	N2b	M0	IVA	XRT	0	0	229	229	1	borderline, 10	10	N	Negative
SQUAMOUS CELL CARCIN	M	61	White	F	75	F	T	T2	N2a	M0	IVA	SUR/CCRT	1	0	265	354	1	low, 8	8	N	Negative
SQUAMOUS CELL CARCIN	M	66	White	F	15	N	T	T2	N2b	M0	IVA	CCRT	0	0	540	540	1	borderline, 20	20	N	Negative
SQUAMOUS CELL CARCIN	M	67	White	F	40	N	T	T2	N2b	M0	IVA	CCRT	0	0	595	595	2	borderline, 20	20	Y	Positive
SQUAMOUS CA, LARGE C	M	70	White	N	0	N	T	T3	N2b	M0	IVA	CCRT	1	0	140	292	2	high, 70	70	Y	Positive
SQUAMOUS CELL CARCIN	M	69	White	F	U	Y	T	T2	N0	M0	II	SUR	0	0	447	447	2	high, 25	25	Y	Positive
SQUAMOUS CELL CARCIN	M	68	White	F	40	Y	S	T2	N1	M0	III	SUR	0	0	457	457	2	high, 30	30	N	Negative
SQUAMOUS CELL CARCIN	M	59	White	N	0	Y	B	T4a	N2c	M0	IVA	CCRT	0	0	249	249	2	high, 25	25	Y	Positive
SQUAMOUS CELL CARCIN	M	57	White	F	40	Y	B	T2	N0	M0	II	XRT	0	0	604	604	3	high, 40	40	Y	Positive
